# Supplementary material for: In silico rational design by molecular modeling of new ketones as photoinitiators in three-component photoinitiating systems: application in 3D printing
Source: Royal Society of Chemistry journal article supplement (doi:10.1039/c9py01874c), 2020-01-01
Supplement: c9py01874c1.pdf [file c9py01874c1.pdf]

## Supporting information

### In-silico rational design by molecular modeling of new ketones as photoinitiators in three-component photoinitiating systems: application on 3D printing

Ke Sun<sup>1</sup>, Yangyang Xu<sup>1</sup>, Frédéric Dumur<sup>2\*</sup>, Fabrice Morlet-Savary<sup>1</sup>, Hong Chen<sup>1</sup>,  
Céline Dietlin<sup>1</sup>, Bernadette Graff<sup>1</sup>, Jacques Lalevée<sup>1\*</sup>, Pu Xiao<sup>3\*</sup>

<sup>1</sup>Institut de Science des Matériaux de Mulhouse, IS2M-UMR CNRS 7361, UHA, 15,  
rue Jean Starcky, Cedex 68057 Mulhouse, France.

<sup>2</sup>Aix Marseille Univ, CNRS, ICR UMR 7273, F-13397 Marseille, France

<sup>3</sup>Research School of Chemistry, Australian National University, Canberra, ACT 2601,  
Australia.

**Table S1.** Summary of the FCs at 405 nm of monomers (TMPTA), under three-component photopolymerization systems between ketones (0.1%, w/w), Iod (Speedcure 938; 2%, w/w) and amine (Speedcure EDB; 2%, w/w).

| <b>Ketones:TMPTA=1:1000</b> |     |     |     |     |     |
|-----------------------------|-----|-----|-----|-----|-----|
| <b>Ketone</b>               | 1   | 2   | 3   | 4   | 5   |
| <b>FCs</b>                  | 50% | 36% | 44% | 45% | 67% |
| <b>Ketone</b>               | 6   | 7   | 8   | 9   | 10  |
| <b>FCs</b>                  | 57% | 30% | 41% | 33% | 43% |

**Table S2.** Summary of the FCs at 405 nm of monomers (Ebecryl 40, under three-component photopolymerization systems between ketones (0.1%, w/w), Iod

(Speedcure 938; 2%, w/w) and amine (Speedcure EDB; 2%, w/w).

| Ketones:Ebecryl 40=1:1000 |     |     |     |     |     |
|---------------------------|-----|-----|-----|-----|-----|
| Ketone                    | 1   | 2   | 3   | 4   | 5   |
| FCs                       | 56% | 54% | 63% | 58% | 54% |
| Ketone                    | 6   | 7   | 8   | 9   | 10  |
| FCs                       | 69% | 61% | 67% | 56% | 51% |

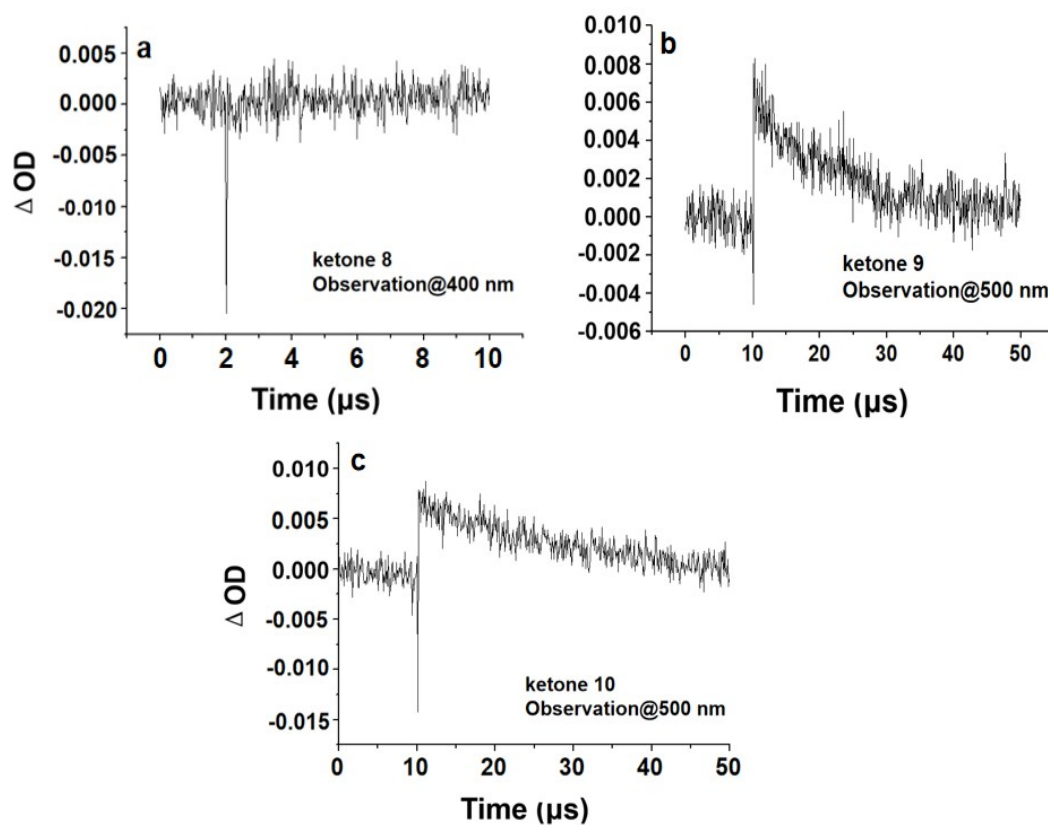

**Figure S1.** Laser flash photolysis for ketone 8, 9, 10: **(a)** ketone 8 ( $2.1 \times 10^{-5} M$  in acetonitrile); **(b)** ketone 9 ( $2.7 \times 10^{-6} M$  in acetonitrile); **(c)** ketone 10 ( $4.1 \times 10^{-6}$  in acetonitrile). Laser excitation @ 355 nm.

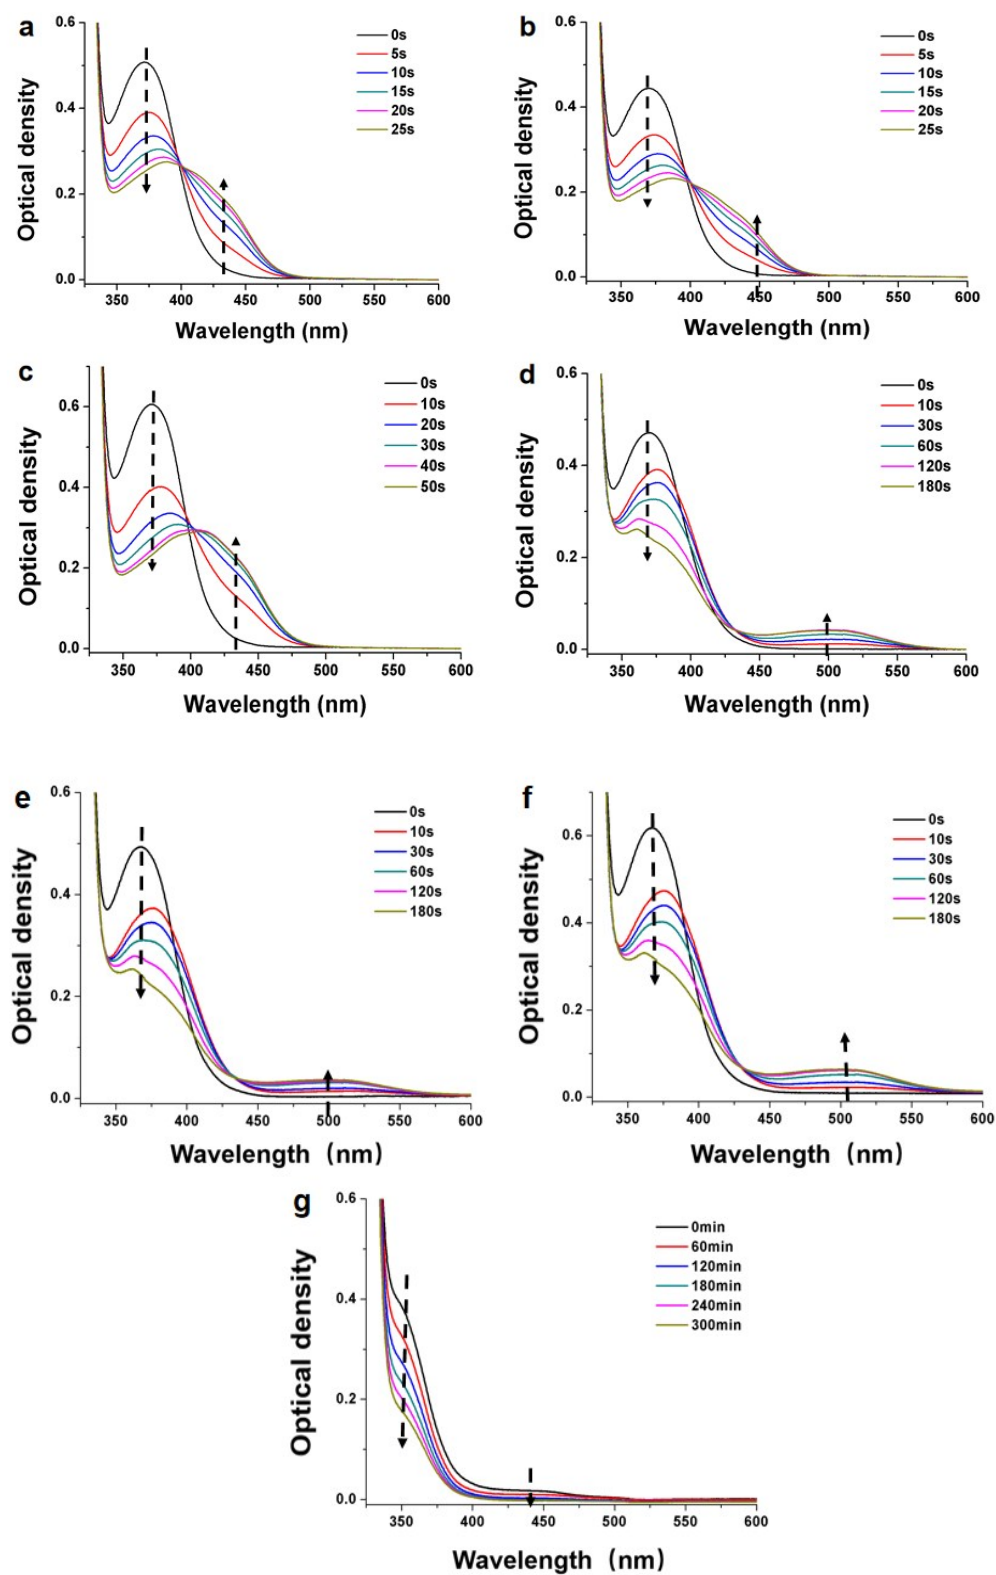

**Figure S2.** UV-vis absorption spectra of ketone 1-7 ( $5 \times 10^{-6}$  g in 1 g acetonitrile) co-initiated with iodonium salt (Speedcure 938,  $1.46 \times 10^{-4}$  M) and amine (Speedcure EDB,

$4.07 \times 10^{-4} \text{M}$ ) upon exposure to LED@405nm under air in the solvent of acetonitrile:  
**(a)** ketone 1; **(b)** ketone 2; **(c)** ketone 3; **(d)** ketone 4; **(e)** ketone 5; **(f)** ketone 6; **(g)**  
ketone 7.

| Ketone                                                                                                                                                                                 | HOMO                                                                                | LUMO                                                                                | Calculated UV spectra                                                                                                                | $E_T$ (kcal mol <sup>-1</sup> ) |
|----------------------------------------------------------------------------------------------------------------------------------------------------------------------------------------|-------------------------------------------------------------------------------------|-------------------------------------------------------------------------------------|--------------------------------------------------------------------------------------------------------------------------------------|---------------------------------|
| 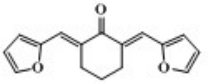<br>Chemical Formula: C <sub>10</sub> H <sub>10</sub> O <sub>3</sub><br>Molecular Weight: 254,2850    |    |    | <br>$\lambda_{\text{max}}=368\text{nm}$ F= 0.988   | 50.81                           |
| <br>Chemical Formula: C <sub>20</sub> H <sub>22</sub> O <sub>3</sub><br>Molecular Weight: 310,3930    |    |    | <br>$\lambda_{\text{max}}=368\text{nm}$ F= 0.958   | 43.08                           |
| <br>Chemical Formula: C <sub>17</sub> H <sub>16</sub> O <sub>3</sub><br>Molecular Weight: 268,3120  |  |  | <br>$\lambda_{\text{max}}=368\text{nm}$ F= 0.983 | 43.29                           |
| <br>Chemical Formula: C <sub>16</sub> H <sub>14</sub> OS <sub>2</sub><br>Molecular Weight: 286,4070 |  |  | <br>$\lambda_{\text{max}}=368\text{nm}$ F= 0.965 | 51.32                           |
| <br>Chemical Formula: C <sub>20</sub> H <sub>22</sub> OS <sub>2</sub><br>Molecular Weight: 342,5150 |  |  | <br>$\lambda_{\text{max}}=369\text{nm}$ F= 0.931 | 43.22                           |

|                                                                                                                                                                          |                                                                                     |                                                                                     |                                                                                                                                                    |       |
|--------------------------------------------------------------------------------------------------------------------------------------------------------------------------|-------------------------------------------------------------------------------------|-------------------------------------------------------------------------------------|----------------------------------------------------------------------------------------------------------------------------------------------------|-------|
| 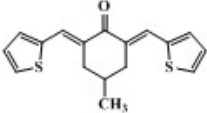 <p>Chemical Formula: <math>C_{17}H_{16}OS_2</math><br/>Molecular Weight: 300,4340</p>  |    |    |  <p><math>\lambda_{max}=368nm</math> <math>F= 0.960</math></p>   | 43.42 |
|  <p>Chemical Formula: <math>C_{15}H_{21}NO</math><br/>Molecular Weight: 231,3390</p>    |    |    |  <p><math>\lambda_{max}=357nm</math> <math>F= 0.0001</math></p>  | 46.67 |
|  <p>Chemical Formula: <math>C_{12}H_{15}NO</math><br/>Molecular Weight: 189,2580</p>    |    |    |  <p><math>\lambda_{max}=357nm</math> <math>F= 0.0007</math></p>  | 46.72 |
|  <p>Chemical Formula: <math>C_{24}H_{26}O_3</math><br/>Molecular Weight: 362,4690</p> |  |  |  <p><math>\lambda_{max}=429nm</math> <math>F= 1.538</math></p> | 41.67 |
|  <p>Chemical Formula: <math>C_{21}H_{22}O_3</math><br/>Molecular Weight: 320,3880</p> |  |  |  <p><math>\lambda_{max}=429nm</math> <math>F= 1.552</math></p> | 41.85 |

**Figure S3.** Contour plots of HOMOs and LUMOs for ketone 1-10; structures optimized at the B3LYP/6-31G\* level of theory; calculated UV spectra and triplet state energy of ketone 1-10.

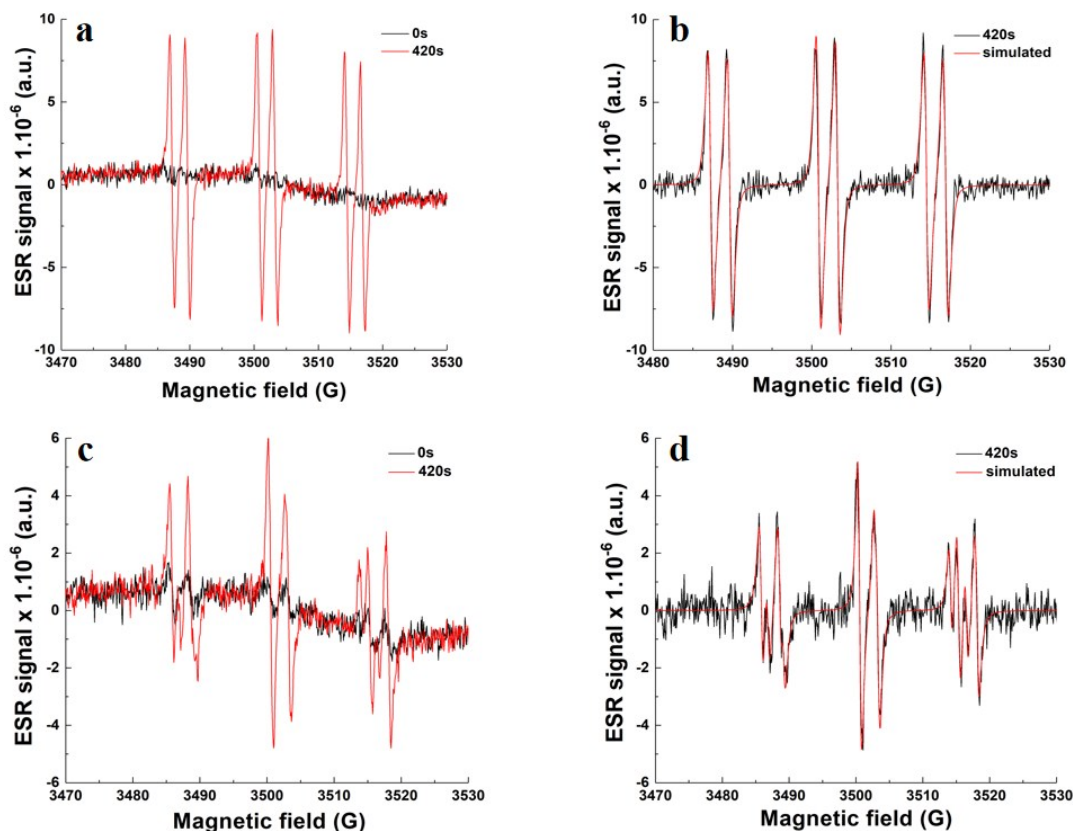

**Figure S4.** ESR spectra obtained from ESR-spin trapping experiment using PBN = 2 mg/mL (as spin trap agent); amine (Speedcure EDB) = 12.6 mg/mL and ketone 8, 9 = 0.8 mg/mL in acetonitrile under  $N_2$ . **left: (a), (c)** ketone 8, 9, Irradiation time =420s (red) and =0s (black) spectra; **right:(b), (d)** ketone 8, 9, irradiation time =420s (red) and simulated (black) spectra.

### Synthetic procedures

2,6-Bis(furan-2-ylmethylene)cyclohexan-1-one **ketone 1**, [E. Aguilera, J. Varela, E. Birriel, E. Serna, S. Torres, G. Yaluff, N. Vera de Bilbao, B. Aguirre-López, N. Cabrera, S. Diaz Mazariegos, M. Tuena de Gúmez Puyou, A. Gúmez-Puyou, R. Pérez-Montfort, L. Minini, A. Merlino, H. Cerecetto, M. Gonzalez, G. Alvarez, ChemMedChem 2016, 11, 1328 – 1338]; 4-(*tert*-butyl)-2,6-bis(furan-2-ylmethylene) cyclohexan-1-one **ketone 2**, [N. Pinto, P. Retailleau, A. Voituriez, A. Marinetti, Chem.Comm.,2011,47, 1015–1017]; 2,6-bis(furan-2-ylmethylene)-4-methylcyclohexan-1-one **ketone 3**, [M. Ahmed Abdel-Rahman, M. Ali Hussein, Des.

Monomers Polym., 2013, 16, 377-388]; 2,6-bis(thiophen-2-ylmethylene) cyclohexan-1-one **ketone 4**, [N. Chakingala, A.B. Puthirath, M.V. Mahesh Kumar, A. Ayyappan, S. Jayalekshmi, P.A. Unnikrishnan, S. Prathapan, Dyes Pigm. 2018, 159, 367-377]; 4-(*tert*-butyl)-2,6-bis(thiophen-2-ylmethylene) cyclohexan-1-one **ketone 5**, [M. Ahmed Abdel-Rahman, M. Ali Hussein, Des. Monomers Polym., 2013, 16, 377-388]; 4-methyl-2,6-bis(thiophen-2-ylmethylene) cyclohexan-1-one **ketone 6**, [M. Ahmed Abdel-Rahman, M. Ali Hussein, Des. Monomers Polym., 2013, 16, 377-388] were synthesized as previously reported in the literature, without modifications and in similar yields.

All reagents and solvents were purchased from Aldrich or Alfa Aesar and used as received without further purification. Mass spectroscopy was performed by the Spectropole of Aix-Marseille University. ESI mass spectral analyses were recorded with a 3200 QTRAP (Applied Biosystems SCIEX) mass spectrometer. The HRMS mass spectral analysis was performed with a QStar Elite (Applied Biosystems SCIEX) mass spectrometer. Elemental analyses were recorded with a Thermo Finnigan EA 1112 elemental analysis apparatus driven by the Eager 300 software. <sup>1</sup>H and <sup>13</sup>C NMR spectra were determined at room temperature in 5 mm o.d. tubes on a Bruker Avance 400 spectrometer of the Spectropole: <sup>1</sup>H (400 MHz) and <sup>13</sup>C (100 MHz). The <sup>1</sup>H chemical shifts were referenced to the solvent peak CDCl<sub>3</sub> (7.26 ppm) and the <sup>13</sup>C chemical shifts were referenced to the solvent peak CDCl<sub>3</sub> (77 ppm). All these carbazole photoinitiators were prepared with analytical purity up to accepted standards for new organic compounds (>98%) which was checked by high field NMR analysis.

*Synthesis of 2-((1H-pyrrol-2-yl) methylene)-4-(tert-butyl) cyclohexan-1-one ketone 7,*

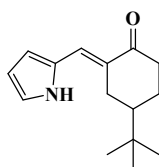

Chemical Formula: C<sub>15</sub>H<sub>21</sub>NO  
Exact Mass: 231.1623  
Molecular Weight: 231.3390

4-*Tert*-butylcyclohexanone (1.55 g, 10 mmol, M = 154.25 g/mol) was dissolved in a mixture of ethanol (20 mL) and water (10 mL). Pyrrole-2-carbaldehyde (1.90 g, 20 mmol, M = 95.10 g/mol) and NaOH 1M (10 mL) were then added at 0°C. The mixture was stirred at room temperature overnight. The yellow precipitate was filtrated off, washed with ethanol and dried under vacuum (1.94 h, 84% yield). <sup>1</sup>H NMR (CDCl<sub>3</sub>) δ : 1.00 (s, 9H), 1.48-1.55 (m, 2H), 1.98-2.04 (m, 1H), 2.30-2.39 (m, 2H), 2.62-2.69 (m, 1H), 2.90-2.96 (m, 1H), 6.38-6.39 (m, 1H), 6.59-6.60 (m, 1H), 7.02-7.03 (m, 1H), 7.65 (s, 1H), 9 31 (brs, 1H, NH); <sup>13</sup>C NMR (CDCl<sub>3</sub>) δ : 23.9, 27.3, 30.0, 32.6, 39.7, 44.9, 111.5, 114.5, 122.2, 127.3, 129.0, 129.3, 200.8; HRMS (ESI MS) m/z: theor: 232.1696 found: 232.1698 ([M+H]<sup>+</sup> detected)

*Synthesis of 2,6-bis((1H-pyrrol-2-yl)methylene)-4-methylcyclohexan-1-one ketone 8,*

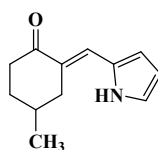

Chemical Formula: C<sub>12</sub>H<sub>15</sub>NO  
Exact Mass: 189.1154  
Molecular Weight: 189.2580

4-Methylcyclohexanone (1.12 g, 1.22 mL, 10 mmol, d = 0.914, M = 112.17 g/mol) was dissolved in a mixture of ethanol (20 mL) and water (10 mL). Pyrrole-2-carbaldehyde (1.90 g, 20 mmol, M = 95.10 g/mol) and NaOH 1M (10 mL) were then added at 0°C. The mixture was stirred at room temperature overnight. The yellow precipitate was filtrated off, washed with ethanol and dried under vacuum (1.48 g, 78% yield). <sup>1</sup>H NMR (CDCl<sub>3</sub>) δ : 1.14 (d, 3H, J = Hz), 1.52-1.66 (m, 1H), 1.90-1.95 (m, 2H), 2.23-2.33 (m, 1H), 2.37-2.49 (m, 1H), 2.57-2.66 (m, 1H), 2.95-3.01 (m, 1H), 6.37 (s, 1H), 6.61 (s, 1H), 7.01 (s, 1H), 7.62 (s, 1H), 9.15 (brs, 1H, NH); <sup>13</sup>C NMR (CDCl<sub>3</sub>) δ : 22.0, 29.6, 30.8, 37.1, 38.7, 111.4, 114.7, 121.9, 122.1, 126.9, 128.5, 129.3, 200.3; HRMS (ESI MS) m/z: theor: 190.1226 found: 190.1227 ([M+H]<sup>+</sup> detected)



*Synthesis of 4-(tert-butyl)-2,6-bis((E)-3-(furan-2-yl) allylidene)cyclohexan-1-one ketone 9,*

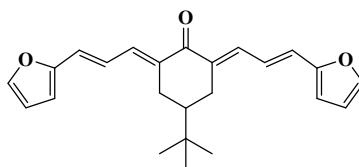

Chemical Formula: C<sub>24</sub>H<sub>26</sub>O<sub>3</sub>

Exact Mass: 362.1882

Molecular Weight: 362.4690

4-*Tert*-butylcyclohexanone (1.55 g, 10 mmol, M = 154.25 g/mol) was dissolved in a mixture of ethanol (20 mL) and water (10 mL). *Trans*-3-(2-furyl) acrolein (2.44 g, 20 mmol, M = 122.12 g/mol) and NaOH 1M (10 mL) were then added at 0°C. During stirring, a sticky solid formed so that THF (20-30 mL) was added to maintain the stirring of the solution. The solution was stirred at room temperature overnight. The yellow precipitate was filtrated off, washed with ethanol and dried under vacuum (2.24 g, 62% yield). <sup>1</sup>H NMR (CDCl<sub>3</sub>) δ : 1.04 (s, 9H), 1.46-1.55 (m, 1H), 2.24 (t, 2H, J = 14.2 Hz), 3.03 (d, 2H, J = 15.8 Hz), 6.45 (m, 4H), 6.72 (d, 2H, J = 15.2 Hz), 6.95 (t, 2H, J = 14.9 Hz), 7.38 (d, 2H, J = 12.0 Hz), 7.45 (s, 2H); <sup>13</sup>C NMR (CDCl<sub>3</sub>) δ : 27.3, 27.8, 32.6, 43.4, 111.7, 112.2, 122.0, 127.0, 135.6, 135.9, 143.5, 153.0, 188.9; HRMS (ESI MS) m/z: theor: 363.1955 found: 363.1952 ([M+H]<sup>+</sup> detected)

*Synthesis of 2,6-bis((E)-3-(furan-2-yl) allylidene)-4-methylcyclohexan-1-one ketone 10,*

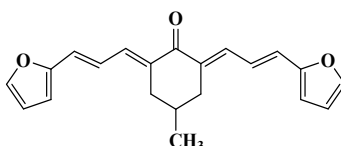

Chemical Formula: C<sub>21</sub>H<sub>20</sub>O<sub>3</sub>

Exact Mass: 320.1412

Molecular Weight: 320.3880

4-Methylcyclohexanone (1.12 g, 1.22 mL, 10 mmol,  $d = 0.914$ ,  $M = 112.17$  g/mol) was dissolved in a mixture of ethanol (20 mL) and water (10 mL). Trans-3-(2-furyl) acrolein (2.44 g, 20 mmol,  $M = 122.12$  g/mol) and NaOH 1M (10 mL) were then added at 0°C. The mixture was stirred at room temperature overnight. The yellow precipitate was filtrated off, washed with ethanol and dried under vacuum (2.18 g, 68% yield).  $^1\text{H}$  NMR ( $\text{CDCl}_3$ )  $\delta$  : 1.14 (d, 3H,  $J = 6.5$  Hz), 1.91-1.99 (m, 1H), 2.25-2.32 (m, 2H), 2.94 (dd, 2H,  $J = 16.1$  Hz,  $J = 3.3$  Hz), 6.44 (s, 4H), 6.72 (d, 2H,  $J = 15.2$  Hz), 6.94 (t, 2H,  $J = 15.2$  Hz), 7.39 (d, 2H,  $J = 12.1$  Hz), 7.43 (s, 2H);  $^{13}\text{C}$  NMR ( $\text{CDCl}_3$ )  $\delta$  : 21.5, 28.4, 34.7, 111.6, 112.2, 122.2, 127.0, 134.8, 136.1, 143.4, 153.0, 188.5; HRMS (ESI MS)  $m/z$ : theor: 321.1485 found: 321.1489 ( $[\text{M}+\text{H}]^+$  detected)
